# Supplementary material for: Electrospun Nanofibers Loaded with Marigold Extract Based on PVP/HPβCD and PCL/PVP Scaffolds for Wound Healing Applications
Source: MDPI journal article supplement (doi:10.3390/ma17081736), 2024-04-10
Supplement: s1 [file materials-2856673-supplementary.pdf › materials-2856673-supplementary.pdf]

| CF-CE/ CF-UAE<br>[cm <sup>-1</sup> ] | narcisin<br>[cm <sup>-1</sup> ] | chlorogenic acid<br>[cm <sup>-1</sup> ] | Assignments |
|--------------------------------------|---------------------------------|-----------------------------------------|-------------|
|                                      |                                 |                                         |             |

|      |      |                                                                                   |
|------|------|-----------------------------------------------------------------------------------|
| 621  | 621  | O-H wagging                                                                       |
| 650  | 650  | O-H wagging                                                                       |
| 669  | 669  | O-H wagging                                                                       |
| 818  | 818  | C-C-C assymmetric stretching + C-H twisting                                       |
| 868  | 870  | CH <sub>2</sub> twisting + C-O-H rocking                                          |
| 980  | 982  | C-C-C symetric stretching + C-O-H rocking                                         |
| 1028 | 1028 | C-O-H rocking                                                                     |
| 1059 | 1057 | C-C-C assymmetric stretching + CH <sub>2</sub> twisting + C-H scissoring          |
| 1078 | 1070 | C-C-C assymmetric stretching + CH <sub>2</sub> twisting + C-H scissoring          |
| 1124 | 1124 | C-H wagging                                                                       |
| 1206 | 1206 | C-H wagging and scissoring + C-O-H scissoring                                     |
|      | 1204 | CH <sub>2</sub> twisting + C-H wagging + O-H scissoring                           |
| 1358 | 1358 | C-O-H scissoring + C-C-C scissoring + C-H scissoring                              |
| 1514 | 1516 | C-O-H scissoring + C-C-C assymmetric stretching + C-H rocking                     |
| 1601 | 1601 | C-O-H scissoring + C-O-C scissoring + C-C-C assymmetric stretching and scissoring |
|      | 1599 | C-C-C scissoring + C-O-H scissoring + C=C-C assymmetric stretching                |
| 1653 | 1653 | C-C-C assymmetric stretching + C-O-H scissoring + C-H rocking                     |

29

**Table S3.** Selected characteristic bonds (in cm<sup>-1</sup>) of CF-CE, HPβCD, PCL, PVP, N1, and N3. Assignments bands of HPβCD [38–42], PVP [42–45], PCL [46,47] were made based on literature

30

31

| CF-CE<br>[cm <sup>-1</sup> ] | HPβC<br>D<br>[cm <sup>-1</sup> ] | PCL<br>[cm <sup>-1</sup> ] | PVP<br>[cm <sup>-1</sup> ] | N1<br>[cm <sup>-1</sup> ] | N3<br>[cm <sup>-1</sup> ] | Assignments                                                                                            |
|------------------------------|----------------------------------|----------------------------|----------------------------|---------------------------|---------------------------|--------------------------------------------------------------------------------------------------------|
| 469                          |                                  |                            |                            | none                      | none                      |                                                                                                        |
|                              |                                  |                            | 571                        | 573                       | 571                       |                                                                                                        |
|                              |                                  | 733                        |                            |                           | ↓ in-<br>intensity        | C–H out of plane bending vibration                                                                     |
| 781                          |                                  |                            |                            | none                      | none                      |                                                                                                        |
| 818                          |                                  |                            |                            | none                      | none                      | chlorogenic acid: C-C-C assymmetric stretching + C-H twisting                                          |
|                              |                                  |                            | 845                        | none                      | 845                       |                                                                                                        |
|                              | 847                              |                            |                            | 847                       |                           | hydrogen bond formation between primary and secondary OH group and the presence of glucopyranose units |
|                              |                                  | 934                        |                            |                           | ↓ in-<br>intensity        |                                                                                                        |
|                              | 948                              |                            |                            | 939                       |                           | presence of glucopyranose units                                                                        |
|                              |                                  | 961                        |                            |                           | ↓ in-<br>intensity        |                                                                                                        |
|                              | 1006                             |                            |                            | 1030                      |                           | C–H, C–O stretching vibrations                                                                         |
| 1030                         |                                  |                            |                            | none                      | none                      | narcissin: C-O-H rocking                                                                               |
|                              |                                  | 1047                       |                            |                           | none                      |                                                                                                        |
| 1055                         |                                  |                            |                            | none                      | none                      | chlorogenic acid: C-C-C assymmetric stretching + CH <sub>2</sub> twisting + C-H scissoring             |
|                              | 1082                             |                            |                            | 1082                      |                           | stretching vibration of the C–C, C–O bonds, and wagging vibration of the C–H bonds                     |
|                              |                                  | 1107                       |                            |                           | none                      |                                                                                                        |
|                              | 1152                             |                            |                            | 1152                      |                           | C–H, C–O stretching vibrations                                                                         |

|      |      |      |                  |                                                                                     |
|------|------|------|------------------|-------------------------------------------------------------------------------------|
|      | 1167 |      | none             | –C–O–C- symmetric stretching                                                        |
|      | 1167 | none | 1167             | C–C=O                                                                               |
|      | 1229 | none | 1225             | lactone structure                                                                   |
|      | 1238 |      | none             | C–O–C asymmetric stretching                                                         |
|      | 1269 | 1273 | ↓ in-<br>tensity |                                                                                     |
|      | 1283 | 1288 | 1287             | C–N stretching vibrations                                                           |
|      | 1294 |      | none             | C–O and C–C bands                                                                   |
|      | 1364 |      | none             | stretching of OH group                                                              |
|      | 1371 | 1369 | 1371             | –CH deformation vibrations                                                          |
| 1404 |      | none | none             |                                                                                     |
|      | 1418 |      | none             |                                                                                     |
|      | 1420 | 1423 | 1423             | CH <sub>2</sub> wagging                                                             |
| 1456 |      | none | none             |                                                                                     |
|      | 1458 | 1462 | 1462             | CH <sub>2</sub> bending vibrations                                                  |
|      | 1472 |      | none             | stretching of CH <sub>2</sub> group                                                 |
|      | 1491 | 1497 | 1493             |                                                                                     |
| 1599 |      | none | none             | chlorogenic acid: C–C–C scissoring + C–O–H scissoring + C=C–C asymmetric stretching |
|      | 1665 | 1655 | 1655             | C=O                                                                                 |
|      | 1722 |      | none             | –C=O stretching vibrations of the ester carbonyl group                              |
| 1732 |      | none | none             |                                                                                     |
| 2855 |      | none | none             |                                                                                     |
|      | 2866 |      | ↓ in-<br>tensity | symmetric stretching of CH <sub>2</sub> group                                       |
| 2915 |      | none |                  | C–H stretching of sp <sup>3</sup> carbons                                           |
| 2924 |      | none | none             |                                                                                     |
|      | 2945 |      | none             | asymmetric stretching of CH <sub>2</sub> group                                      |
|      | 2951 |      | 2951             | C–H stretching vibrations                                                           |
| 3318 |      | 3372 | 3404             |                                                                                     |
| 3350 |      | 3372 |                  | O–H stretching vibrations                                                           |

**Table S4.** Selected characteristic bonds (in  $\text{cm}^{-1}$ ) of CF-UAE, HP $\beta$ CD, PCL, PVP, N1, and N3. Assignments bands of HP $\beta$ CD [38–42], PVP [42–45], PCL [46,47] were made based on literature

| CF-UAE<br>[ $\text{cm}^{-1}$ ] | HP $\beta$ CD<br>D<br>[ $\text{cm}^{-1}$ ] | PCL<br>[ $\text{cm}^{-1}$ ]<br>] | PVP<br>[ $\text{cm}^{-1}$ ]<br>] | N2<br>[ $\text{cm}^{-1}$ ]<br>] | N4<br>[ $\text{cm}^{-1}$ ] | Assignments                                                                                            |
|--------------------------------|--------------------------------------------|----------------------------------|----------------------------------|---------------------------------|----------------------------|--------------------------------------------------------------------------------------------------------|
| 469                            |                                            |                                  |                                  | none                            | none                       |                                                                                                        |
|                                |                                            |                                  | 571                              | 577                             | 571                        |                                                                                                        |
|                                |                                            | 733                              |                                  |                                 | none                       | C–H out of plane bending vibration                                                                     |
| 781                            |                                            |                                  |                                  | none                            | none                       |                                                                                                        |
| 818                            |                                            |                                  |                                  | none                            | none                       | chlorogenic acid: C–C–C assymmetric stretching + C–H twisting                                          |
|                                |                                            |                                  | 845                              | none                            | 845                        |                                                                                                        |
|                                | 847                                        |                                  |                                  | 847                             |                            | hydrogen bond formation between primary and secondary OH group and the presence of glucopyranose units |
|                                |                                            | 934                              |                                  |                                 | none                       |                                                                                                        |
|                                | 948                                        |                                  |                                  | ↓ in-<br>ten-<br>sity           |                            | presence of glucopyranose units                                                                        |
|                                |                                            | 961                              |                                  |                                 | none                       |                                                                                                        |
|                                | 1006                                       |                                  |                                  | 1034                            |                            | C–H, C–O stretching vibrations                                                                         |
| 1030                           |                                            |                                  |                                  | none                            | none                       | narcissin: C–O–H rocking                                                                               |
|                                |                                            | 1047                             |                                  |                                 |                            |                                                                                                        |
| 1055                           |                                            |                                  |                                  | none                            | 1059                       | chlorogenic acid: C–C–C assymmetric stretching + CH <sub>2</sub> twisting + C–H scissoring             |
|                                | 1082                                       |                                  |                                  | 1084                            |                            | stretching vibration of the C–C, C–O bonds, and wagging vibration of the C–H bonds                     |
|                                |                                            | 1107                             |                                  |                                 | none                       |                                                                                                        |
|                                | 1152                                       |                                  |                                  | 1152                            |                            | C–H, C–O stretching vibrations                                                                         |
|                                |                                            | 1167                             |                                  |                                 | none                       | –C–O–C– symmetric stretching                                                                           |
|                                |                                            |                                  | 1167                             | none                            | 1167                       | C–C=O                                                                                                  |
|                                |                                            |                                  | 1229                             | none                            | 1229                       | lactone structure                                                                                      |
|                                |                                            | 1238                             |                                  |                                 | none                       | C–O–C asymmetric stretching                                                                            |
|                                |                                            |                                  | 1269                             | ↓ in-<br>ten-<br>sity           | ↓ in-<br>ten-<br>sity      |                                                                                                        |
|                                |                                            |                                  | 1283                             | 1288                            | 1287                       | C–N stretching vibrations                                                                              |
|                                |                                            | 1294                             |                                  |                                 | none                       | C–O and C–C bands                                                                                      |
|                                |                                            | 1364                             |                                  |                                 | none                       | stretching of OH group                                                                                 |
|                                |                                            |                                  | 1371                             | 1373                            | 1371                       | –CH deformation vibrations                                                                             |
| 1404                           |                                            |                                  |                                  | none                            | none                       |                                                                                                        |
|                                |                                            | 1418                             |                                  |                                 | none                       |                                                                                                        |
|                                |                                            |                                  | 1420                             | 1423                            | 1423                       | CH <sub>2</sub> wagging                                                                                |
| 1456                           |                                            |                                  |                                  | none                            | none                       |                                                                                                        |
|                                |                                            |                                  | 1458                             | 1462                            | 1462                       | CH <sub>2</sub> bending vibrations                                                                     |
|                                |                                            | 1472                             |                                  |                                 | none                       | stretching of CH <sub>2</sub> group                                                                    |
| 1599                           |                                            |                                  |                                  | none                            | none                       | chlorogenic acid: C–C–C scissoring + C–O–H scissoring + C=C–C assymmetric stretching                   |
|                                |                                            |                                  | 1665                             | 1657                            | 1655                       | C=O                                                                                                    |
|                                |                                            | 1722                             |                                  |                                 | none                       | –C=O stretching vibrations of the ester carbonyl group                                                 |

|      |      |                                                |                           |
|------|------|------------------------------------------------|---------------------------|
| 2855 | none | ↓ in-<br>tensity                               |                           |
| 2866 | none | symmetric stretching of CH <sub>2</sub> group  |                           |
| 2915 | none | C–H stretching of sp <sup>3</sup> carbons      |                           |
| 2924 | none | none                                           |                           |
| 2945 | 2947 | asymmetric stretching of CH <sub>2</sub> group |                           |
| 2951 | 2934 | none                                           | C–H stretching vibrations |
| 3318 | 3387 | 3431                                           |                           |
| 3350 | 3387 | O–H stretching vibrations                      |                           |

**Table S5.** Parameters of mathematical models fitted to the chlorogenic acid release profiles of nanofibers N1–N4

| Formulation |                    | Mathematical model |                     |                |                 |                |                          |             |
|-------------|--------------------|--------------------|---------------------|----------------|-----------------|----------------|--------------------------|-------------|
| No.         | Zero-order kinetic |                    | First-order kinetic |                | Higuchi kinetic |                | Korsmeyer-Peppas kinetic |             |
|             | K                  | R <sup>2</sup>     | K                   | R <sup>2</sup> | K               | R <sup>2</sup> | R <sup>2</sup>           | n           |
| N1          | 1.49               | 0.21               | 0.05                | 0.08           | <b>7.72</b>     | <b>0.79</b>    | 0.63                     | 0.53        |
| N2          | 1.82               | 0.24               | 0.05                | 0.09           | <b>9.00</b>     | <b>0.83</b>    | 0.58                     | 0.40        |
| N3          | <b>2.76</b>        | <b>0.94</b>        | 0.64                | 0.30           | 5.50            | 0.76           | <b>0.95</b>              | <b>0.40</b> |
| N4          | <b>2.86</b>        | <b>0.87</b>        | 0.11                | 0.44           | 6.13            | 0.82           | <b>0.90</b>              | <b>0.40</b> |

the most fitting mathematical model is shown in bold

**Table S6.** Comparison of the chlorogenic acid release profiles of nanofibers N1–N4

|    | N1                                               | N2                                              | N3                                               |
|----|--------------------------------------------------|-------------------------------------------------|--------------------------------------------------|
| N1 |                                                  |                                                 |                                                  |
| N2 | f <sub>1</sub> = 12.11<br>f <sub>2</sub> = 32.79 |                                                 |                                                  |
| N3 | f <sub>1</sub> = 65.44<br>f <sub>2</sub> = 3.82  | f <sub>1</sub> = 69.17<br>f <sub>2</sub> = 7.51 |                                                  |
| N4 | f <sub>1</sub> = 59.15<br>f <sub>2</sub> = 1.63  | f <sub>1</sub> = 63.57<br>f <sub>2</sub> = 5.68 | f <sub>1</sub> = 18.17<br>f <sub>2</sub> = 46.98 |

**Table S7.** Correlation matrix

|                              | Diameter | Dissolution<br>in 2 hours | Wound closure<br>in 36 hours |
|------------------------------|----------|---------------------------|------------------------------|
| Diameter                     |          | 0.9433                    | -0.1924                      |
| Dissolution<br>in 2 hours    | 0.9433   |                           | -0.1880                      |
| Wound closure<br>in 36 hours | -0.1924  | -0.1880                   |                              |
